# Supplementary material
Source: PubMed Central journal article supplement (PMC5312498)
Supplement: Supp_Fig1.pdf [file Supp_Fig1.pdf]

## SUPPLEMENTARY DATA

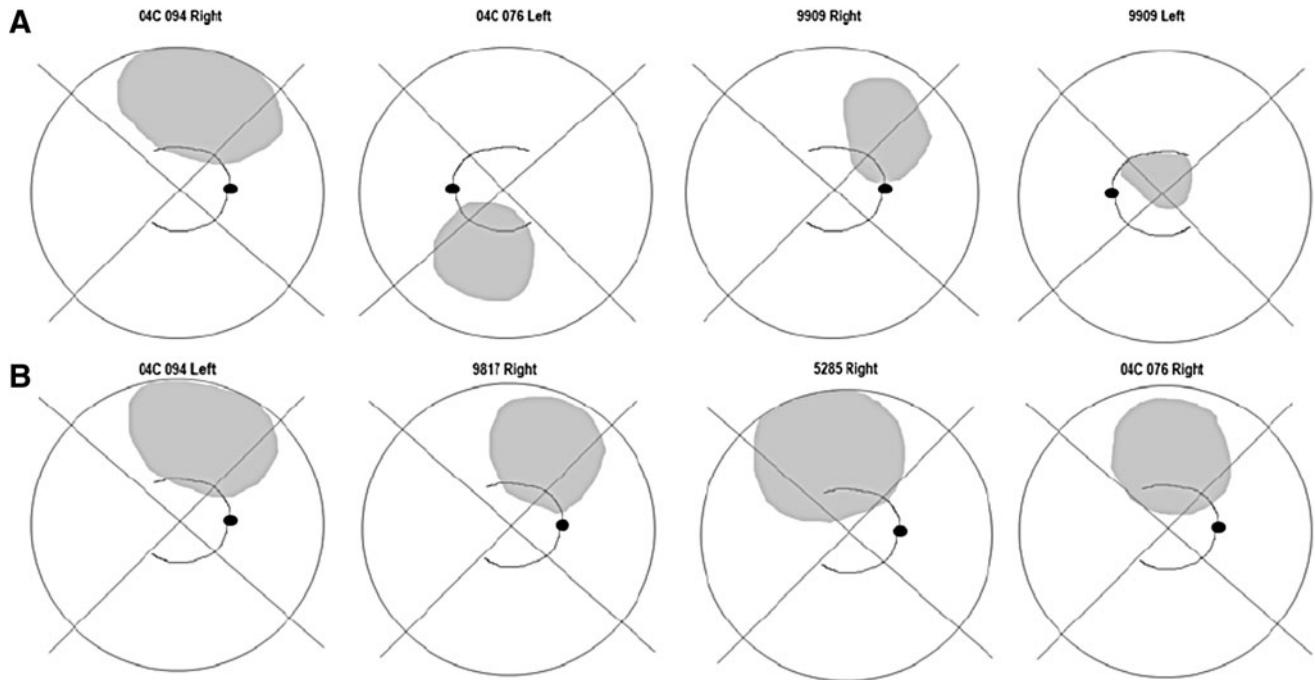

**Supplementary Figure S1.** Subretinal injection sites in the NHP eyes for **(A)** AAV8b and **(B)** AAV7m8. The subretinal injections targeted the macula area of the eye. The *gray filled areas* represent the area of the retina exposed to AAV delivery. The *black dot* represents the fovea, and the *semi-circle* represents the macula.

---
