# Supplementary material
Source: PubMed Central journal article supplement (PMC5312498)
Supplement: Supp_Fig2.pdf [file Supp_Fig2.pdf]

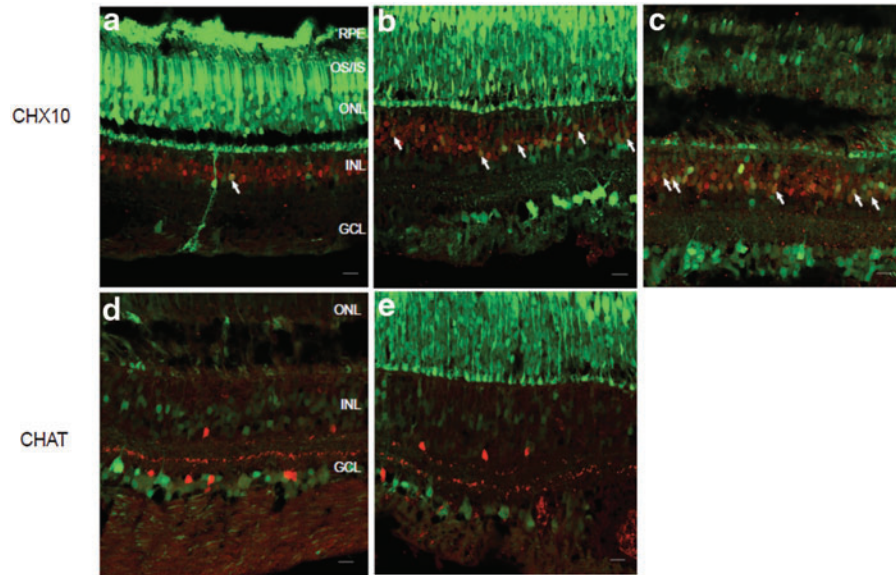

**Supplementary Figure S2.** Cell types transduced with AAV7m8-eGFP in the inner retina. **(a–c)** Rod and cone bipolar cells are labeled with anti-CHX10 (*red*) in tissue sections expressing eGFP (*green*) subretinally at  $1E + 11$  vg **(a)** and  $1E + 12$  vg **(b)**, as well as those by intravitreal injections at  $1E + 12$  vg **(c)**. *Arrows* indicate eGFP-positive cells stained with CHX10 showing co-localization. In addition, amacrine cells were labeled with anti-CHAT antibodies (*red*) in retinal sections transduced by subretinal injections **(d)** and IVI **(e)** at  $1E + 12$  vg. No co-localization was observed with amacrine cells. DAPI-stained nuclei are shown in *blue*. Scale bars represent  $50 \mu\text{m}$ .
