# Supplementary material
Source: PubMed Central journal article supplement (PMC5312498)
Supplement: Supp_Fig3.pdf [file Supp_Fig3.pdf]

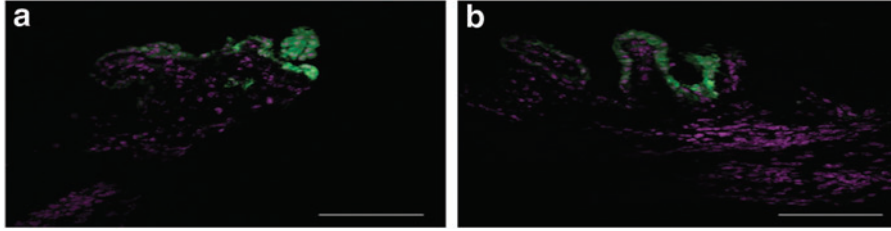

**Supplementary Figure S3.** Anterior segment transgene expression after AAV7m8 delivery in the mouse. Anterior segment structures: iris pigmented epithelium of the iris and ciliary processes are transduced (*green*) post IVI with AAV7m8-CMV/CBA-eGFP at  $1e + 9$  vg. Shown are results from two different mice (**a** and **b**). DAPI-stained nuclei are shown in *magenta*. Scale bars represent  $50 \mu\text{m}$ .

---
