# Supplementary material
Source: PubMed Central journal article supplement (PMC5312498)
Supplement: Supp_Fig4.pdf [file Supp_Fig4.pdf]

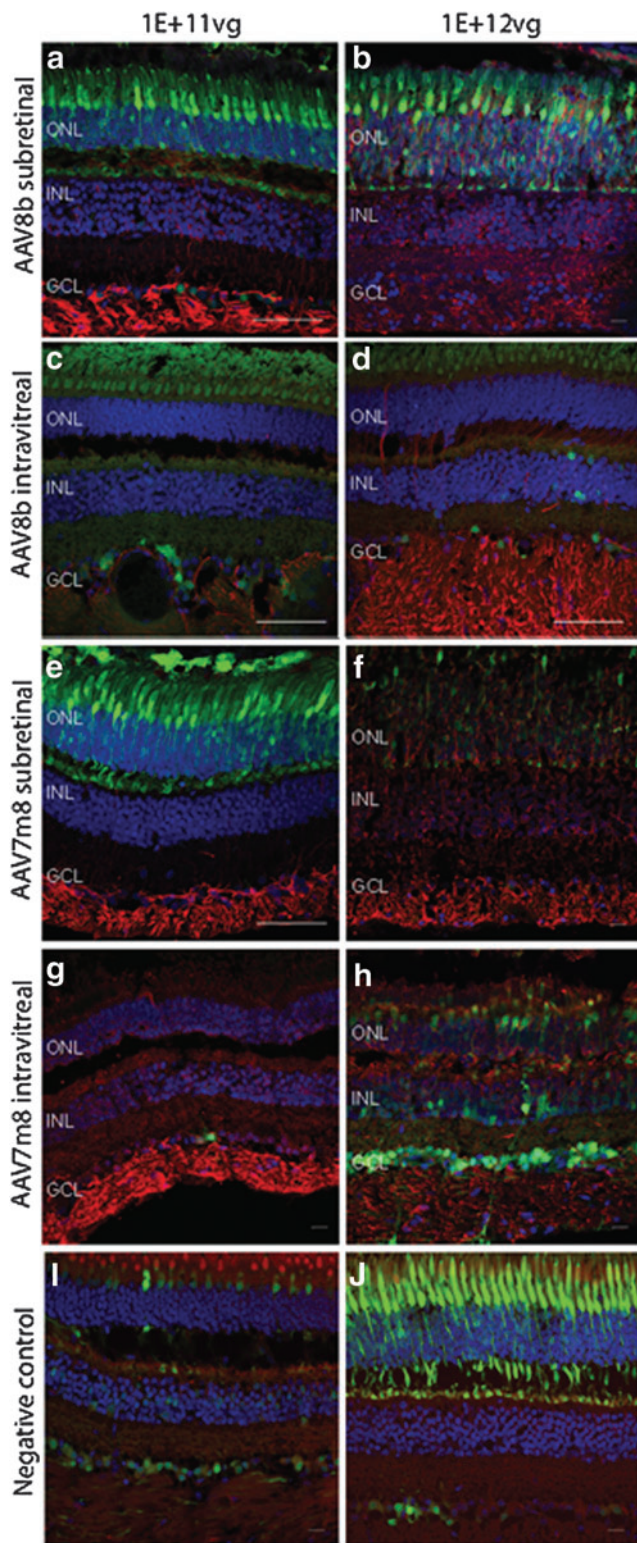

**Supplementary Figure S4.** GFAP in NHP retinas injected with AAV8BP2 (a–d) and AAV7m8 (e–h). At doses of  $1e + 11$  vg and  $1e + 12$  vg, the study looked at the presence of GFAP (red) as a marker of toxicity in areas of the retinas expressing eGFP (green). AAV8BP2-mediated eGFP expression after subretinal injections at  $1e + 11$  vg (a) and  $1e + 12$  vg (b), and after IVI at  $1e + 11$  vg (c) and  $1e + 12$  vg (d). AAV7m8-mediated eGFP expression after subretinal injections at  $1e + 11$  vg (e) and  $1e + 12$  vg (f), and after intravitreal injections at  $1e + 11$  vg (g) and  $1e + 12$  vg (h). (i and j) Secondary antibody only: negative control for GFAP on AAV7m8 transduced sections. DAPI is shown in blue and marks the nuclei. Scale bars represent  $50 \mu\text{m}$ .
