# Supplementary material
Source: PubMed Central journal article supplement (PMC5312498)
Supplement: Supp_Fig5.pdf [file Supp_Fig5.pdf]

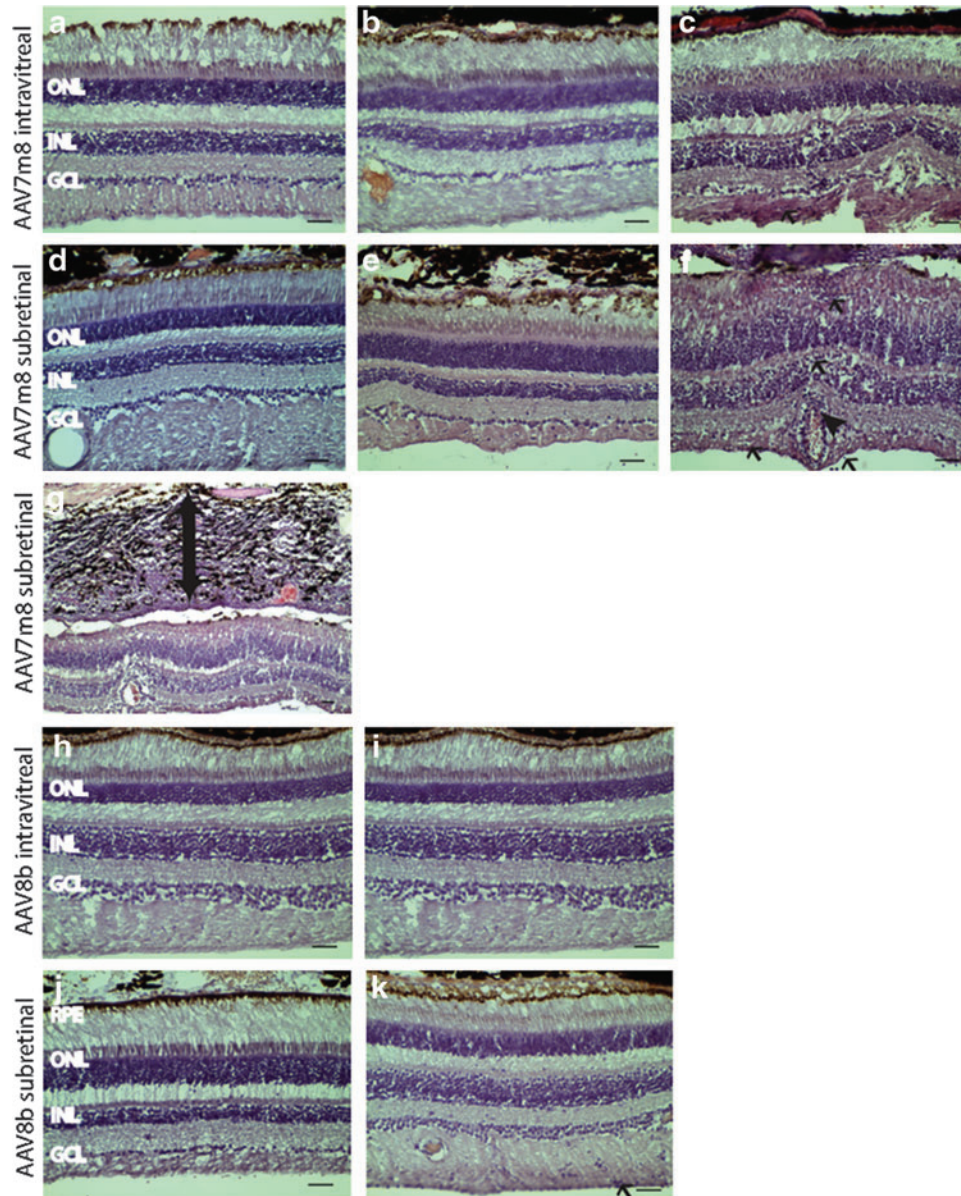

**Supplementary Figure S5.** Examination of retinal infiltrates. H&E staining on retinal sections exposed to AAV7m8 (a–f) and AAV8BP2 (h–k). (a–c) IVI of AAV7m8 at  $1e + 10$  vg (a),  $1e + 11$  vg (b), and  $1e + 12$  vg (c). (d–g) Subretinal injections at  $1e + 10$  vg (d),  $1e + 11$  vg (e), and  $1e + 12$  vg (f). Subretinal injection of AAV7m8 at  $1e + 12$  vg (f and g) showed lymphocytic infiltrates (arrows) in all layers, perivascular inflammation (arrowhead) loss of RPE seen in (f), and massive choroidal inflammation (width of the choroid is marked with a double sided arrow) seen in (g). AAV8BP2-injected retinas at doses of  $1e + 11$  vg (h) and  $1e + 12$  vg (i) by IVI and doses of  $1e + 11$  vg (j) and  $1e + 12$  vg (k) by subretinal delivery are shown. Arrow in (k) represents retinal infiltrates observed. Scale bars represent  $50 \mu\text{m}$ .
